# Supplementary material
Source: PubMed Central journal article supplement (PMC4247573)
Supplement: supp_tpc.114.129437_tpc129437_SupplementalData.pdf [file supp_tpc.114.129437_tpc129437_SupplementalData.pdf]

(A)

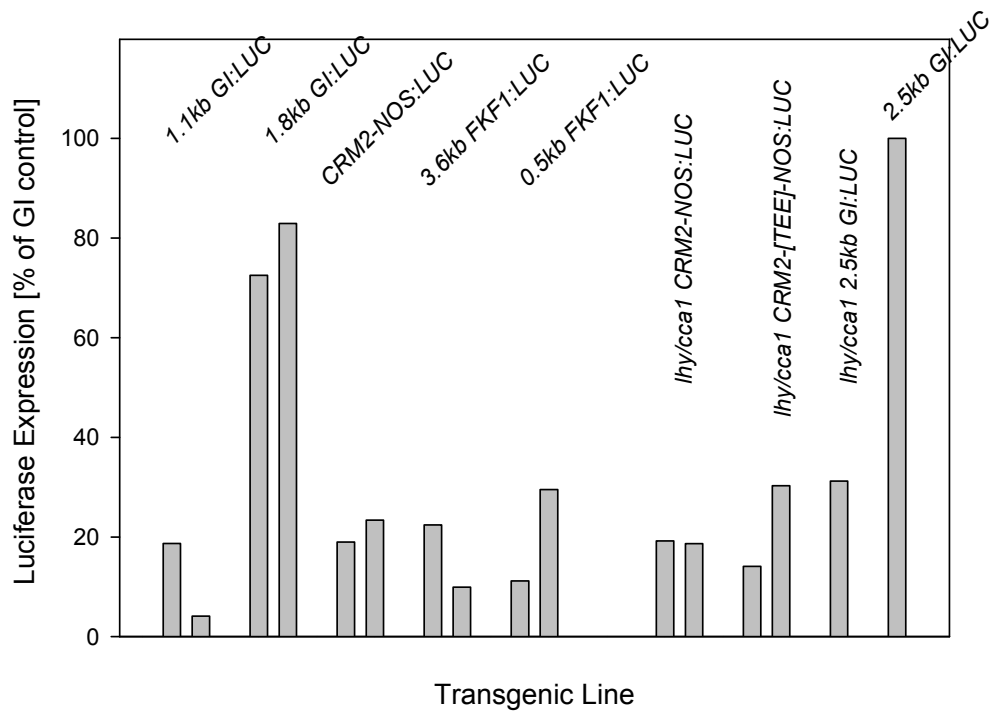

(B)

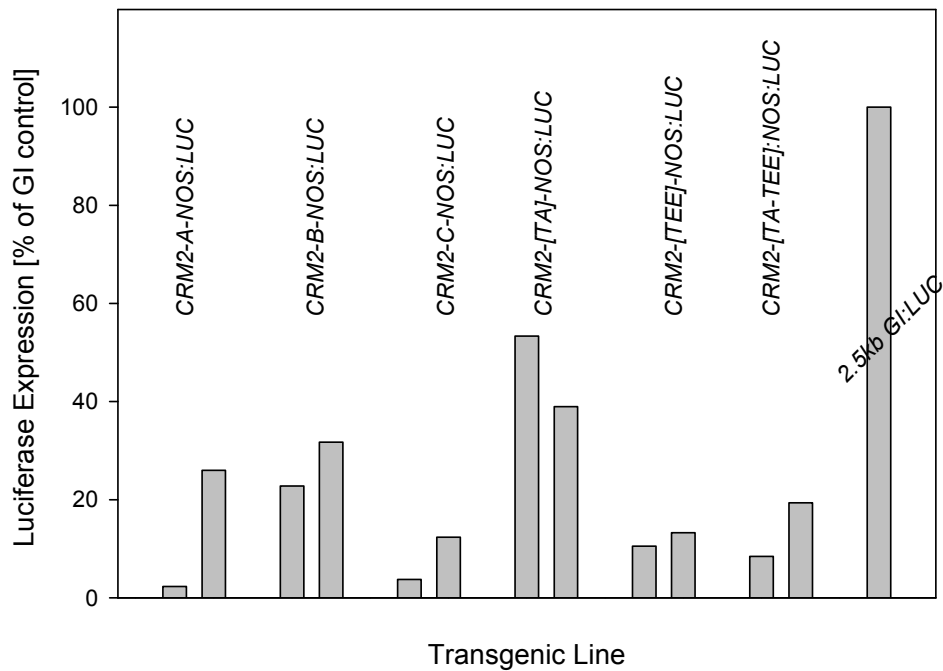

|                               | Average Luc Expr. | SE      | % of GI:LUC |
|-------------------------------|-------------------|---------|-------------|
| 1.1kb GI:LUC_1                | 725.09            | 98.36   | 18.71       |
| 1.1kb GI:LUC_2                | 159.37            | 19.91   | 4.11        |
| 1.8kb GI:LUC_1                | 2810.10           | 242.20  | 72.50       |
| 1.8kb GI:LUC_2                | 3212.50           | 435.19  | 82.88       |
| CRM2-NOS:LUC_1                | 1074.68           | 124.12  | 18.96       |
| CRM2-NOS:LUC_2                | 1170.38           | 97.67   | 23.37       |
| 2.5kb GI:LUC                  | 5667.40           | 1334.14 | 100.00      |
|                               |                   |         |             |
| CRM2-A-NOS:LUC_1              | 113.56            | 10.45   | 2.27        |
| CRM2-A-NOS:LUC_2              | 1300.19           | 263.86  | 25.97       |
| CRM2-B-NOS:LUC_1              | 1230.65           | 94.08   | 22.74       |
| CRM2-B-NOS:LUC_2              | 1714.30           | 278.29  | 31.68       |
| CRM2-C-NOS:LUC_1              | 186.83            | 22.70   | 3.73        |
| CRM2-C-NOS:LUC_2              | 617.81            | 120.57  | 12.34       |
|                               |                   |         |             |
| CRM2-[TA]-NOS:LUC_1           | 3021.41           | 326.33  | 53.31       |
| CRM2-[TA]-NOS:LUC_2           | 2207.15           | 290.23  | 38.94       |
| CRM2-[TEE]-NOS:LUC_1          | 595.81            | 56.05   | 10.51       |
| CRM2-[TEE]-NOS:LUC_2          | 750.39            | 114.70  | 13.24       |
| CRM2-[TA-TEE]-NOS:LUC_1       | 476.49            | 41.66   | 8.41        |
| CRM2-[TA-TEE]-NOS:LUC_2       | 1095.89           | 151.94  | 19.34       |
|                               |                   |         |             |
| 3.6kb FKF1:LUC_1              | 1163.08           | 156.59  | 22.43       |
| 3.6kb FKF1:LUC_2              | 515.26            | 25.37   | 9.94        |
| 0.5kb FKF1:LUC_1              | 579.14            | 45.88   | 11.17       |
| 0.5kb FKF1:LUC_2              | 1528.56           | 155.04  | 29.48       |
|                               |                   |         |             |
| Ihy/cca1 CRM2-NOS:LUC_1       | 743.72            | 137.46  | 19.19       |
| Ihy/cca1 CRM2-NOS:LUC_2       | 723.27            | 59.11   | 18.66       |
| Ihy/cca1 CRM2-[TEE]-NOS:LUC_1 | 545.78            | 41.85   | 14.08       |
| Ihy/cca1 CRM2-[TEE]-NOS:LUC_2 | 1173.17           | 216.61  | 30.27       |
| Ihy/cca1 2.5kb GI:LUC         | 1210.07           | 164.30  | 31.22       |

**Supplemental Figure 1.** Absolute gene expression patterns in all lines used in this study.

**(A)(B)(C)** Absolute luciferase activity was calculated from experiments shown in Figures 2, 3, 5, and 7. To make different independent experiments comparable, each absolute 24h expression pattern was normalised to the internal 2.5kb *Gl:LUC* control on the same respective plate. Details to the experimental settings are described in the respective figures and in the Methods section. **(C)** shows all absolute values as plotted in **(A)** and **(B)**.

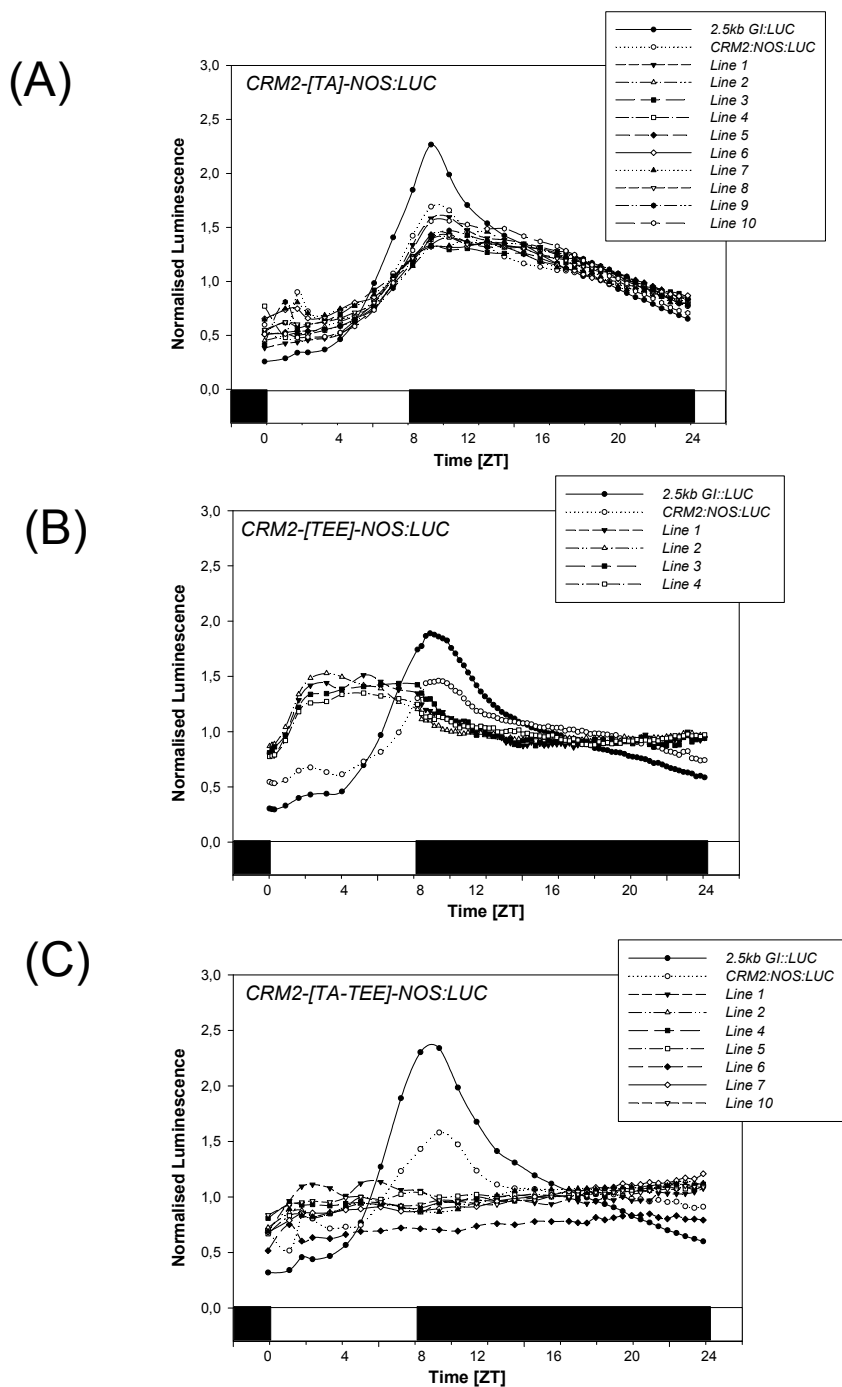

**Supplemental Figure 2.** Diurnal expression patterns of *G1* promoter constructs with point mutations in multiple independent lines  
 Diurnal expression patterns of different *G1* promoter fragments. Plants with the *CRM2-[TA]-NOS:LUC* (A), *CRM2-[TEE]-NOS:LUC* (B) and the *CRM2-[TA-TEE]-NOS:LUC* (C) were grown for 7d under SDs (8h L/16h D) and then measured under this light regime for 24h in a TopCount. 10 independent heterozygous T2 lines (4 for the *CRM2-[TEE]-NOS:LUC* construct) of the indicated construct were compared to *CRM2-NOS:LUC* and *2.5kb G1:LUC*. All experiments represent the average of ~8 seedlings. Black and white boxes indicate dark/light cycles. ZT is Zeitgeber Time, and here represents time from lights on at dawn.

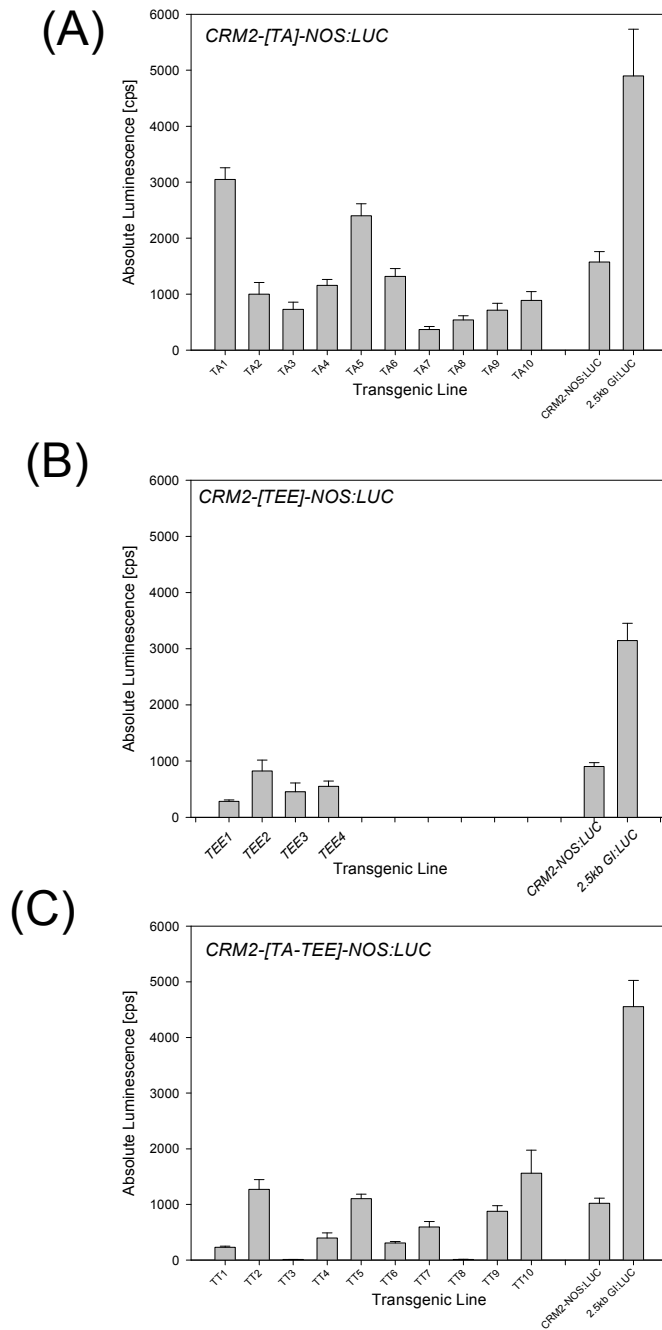

**Supplemental Figure 3.** Absolute expression level of *G1* promoter constructs with point mutations in multiple independent lines.

Absolute expression patterns of different *G1* promoter fragments. Plants with the CRM2-[TA]-NOS:LUC **(A)**, CRM2-[TEE]-NOS:LUC **(B)** and the CRM2-[TA-TEE]-NOS:LUC **(C)** were grown for 7d under SDs (8h L/16h D) and then measured under this light regime for 24h in a TopCount. 10 independent heterozygous T2 lines (4 for the CRM2-[TEE]-NOS:LUC construct) of the indicated construct were compared to CRM2-NOS:LUC and 2.5kb *G1*:LUC. All experiments represent the average absolute Luminescence of ~8 seedlings during 24h of measurement. Error Bars = SE

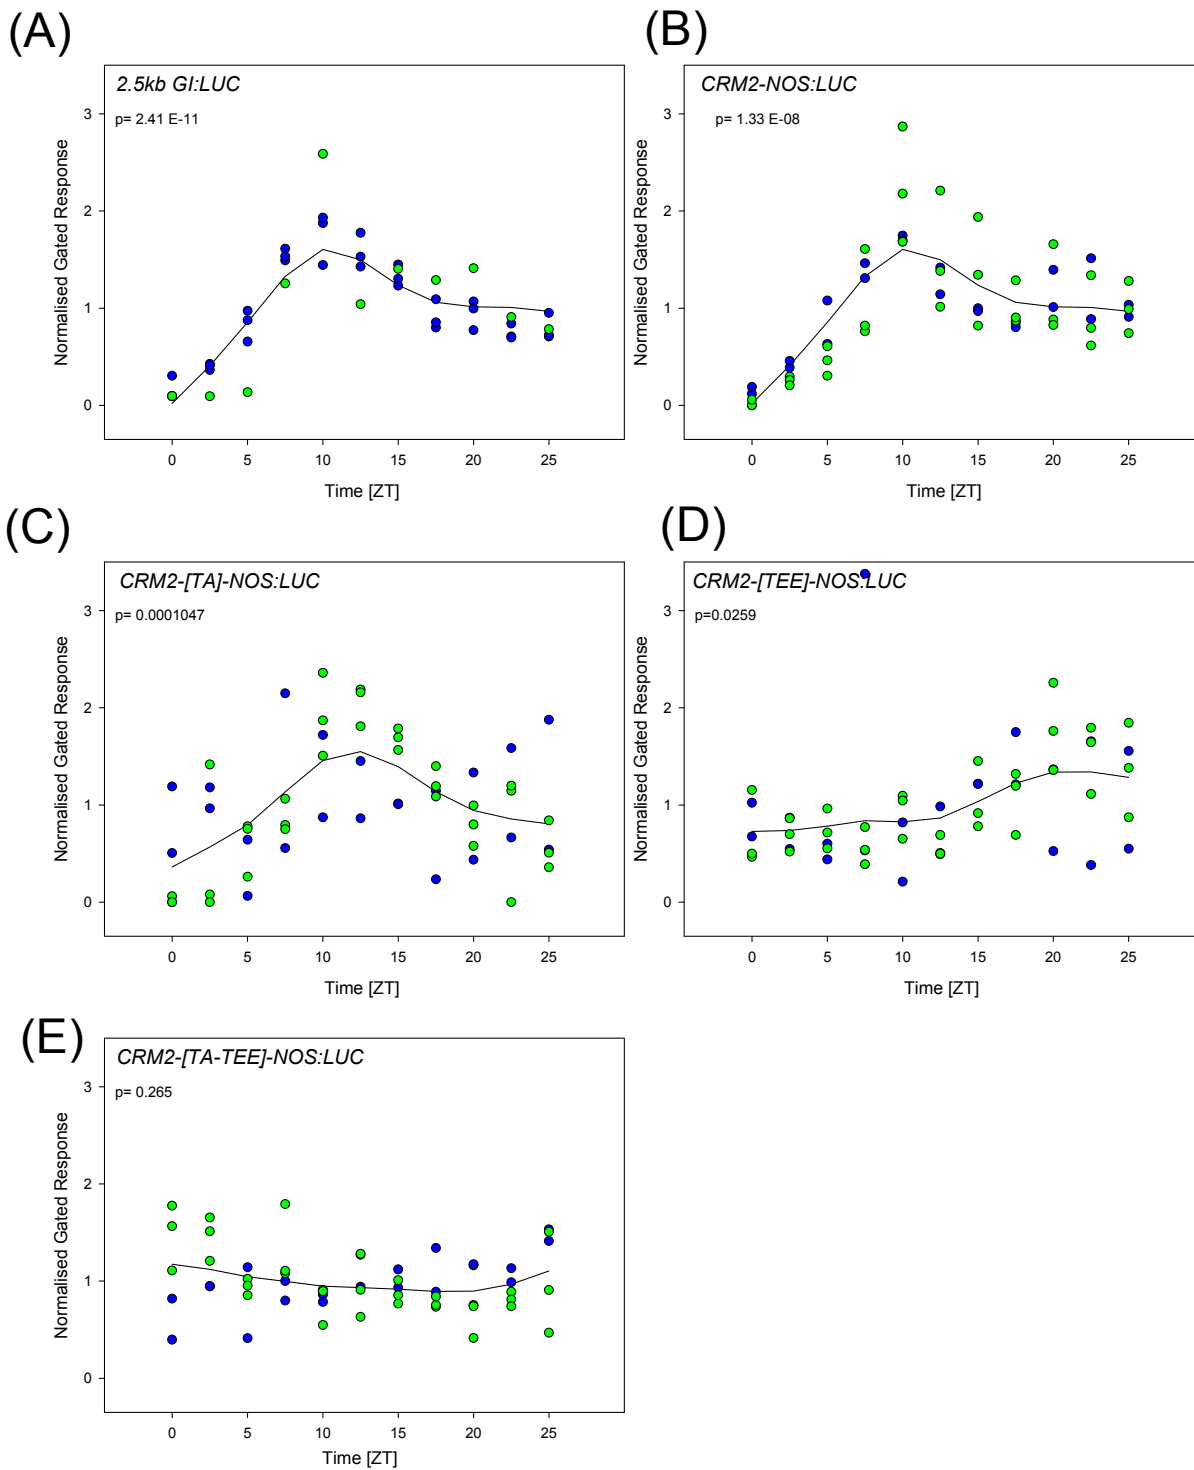

**Supplemental Figure 4.** Statistical analysis of light gating in different constructs with *cis*-element mutations

All values were normalised to their own 24h mean and the deviation from this mean was calculated for each timepoint. P values < 0.01 indicate a gated response. Each circle represents a normalised peak value from gating experiments as shown in Fig. 4. Blue circles represent same data as shown in Fig. 4. with an independent replicate of the same transformant line (n=12 seedlings). Green circles represent data from additional gating experiments with 3 independent transformant lines (n=3-6 seedlings). The black lines show regression curves as calculated by the generalised additive model. TA=Triple ABREL mutation. TEE=Triple EE mutation. **(A)** shows the same 2.5kb *GI:LUC* reference line from 4 independent experiments. ZT is Zeitgeber Time, and here represents time from lights on at dawn.

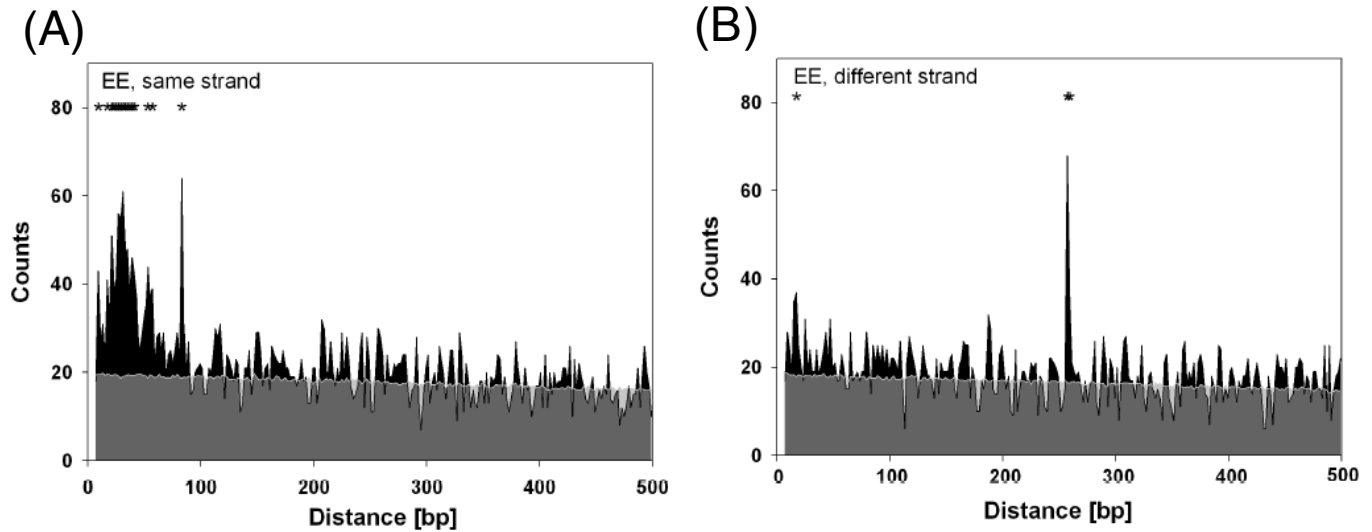

**Supplemental Figure 5.** Genome-wide analysis of EE positions

(A) and (B) EEs (containing the EE, the CBS and the SEE) were mapped within 3kb regions upstream of start codons of all *A. thaliana* genes. A random background was generated and compared to the actual EE distribution (details in the methods section). Analysis was done independently for EEs occurring on the same (A) or different (B) strand. X-axis distance of an EE from the closest neighbouring EE. Gray shade indicates the calculated background distribution. Asterisks indicate statistically significant over-representations ( $p < 0.05$ ).



(A)

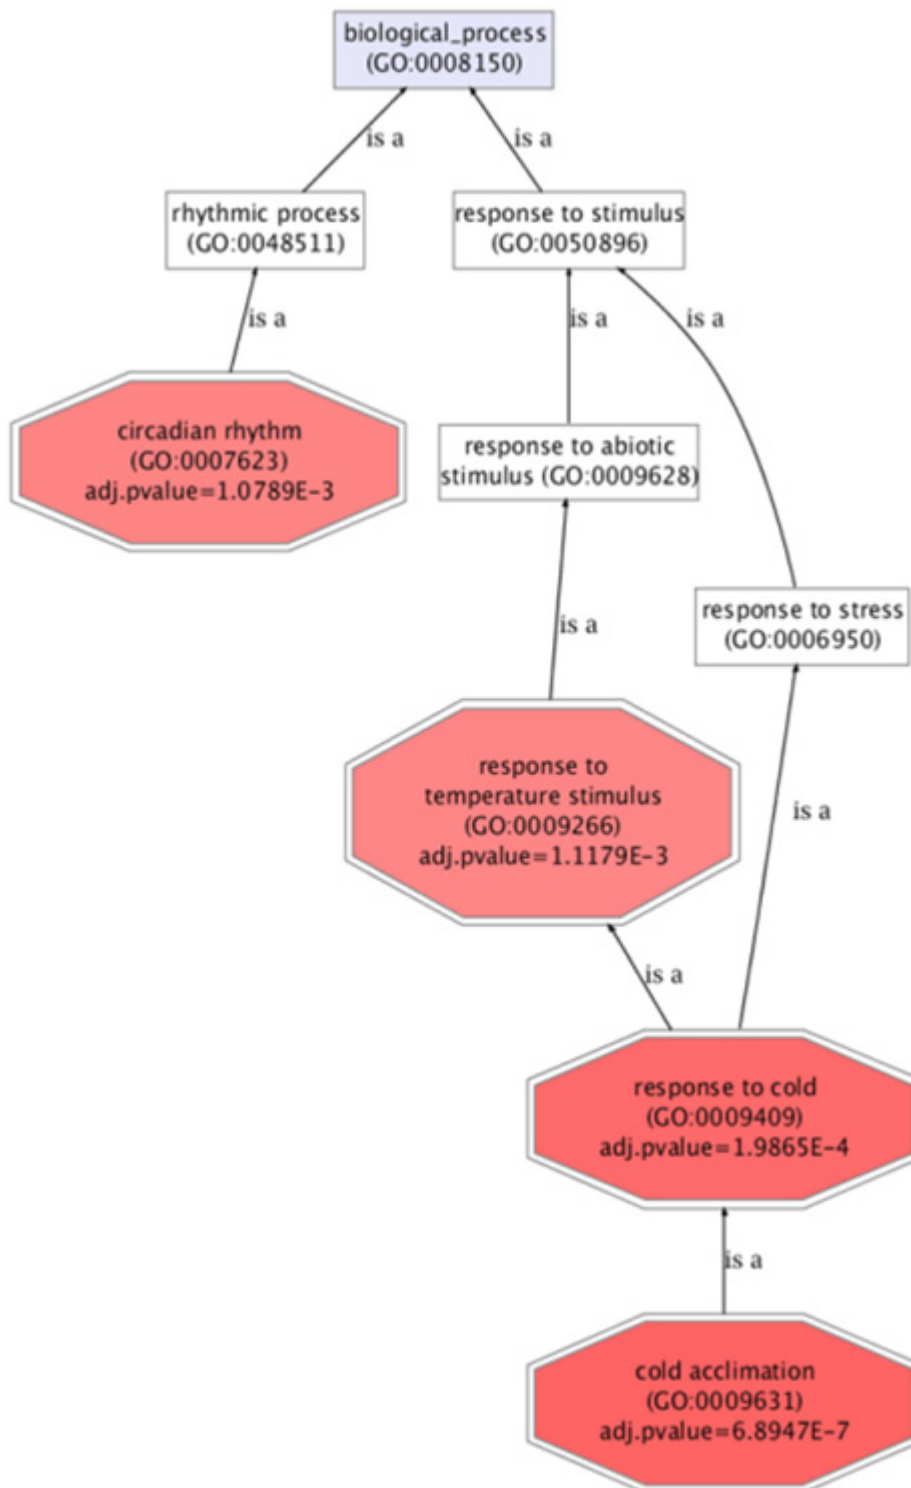

GO biological process (levels from 3 to 9)

(B)

| Genome: Arabidopsis thaliana |       |                |          |
|------------------------------|-------|----------------|----------|
| Condition: longday           |       |                |          |
| Query Loci: 71               |       |                |          |
| Phase                        | Count | Expected Count | P-value  |
| no data                      | 5     |                |          |
| 10                           | 10    | 2.64           | 2.85e-04 |
| 12                           | 4     | 1.33           | 4.39e-02 |
| 8                            | 5     | 2.12           | 6.11e-02 |
| 13                           | 3     | 1.03           | 8.45e-02 |
| 11                           | 3     | 1.42           | 1.71e-01 |
| 19                           | 2     | 0.91           | 2.31e-01 |
| 16                           | 3     | 1.74           | 2.52e-01 |
| 17                           | 2     | 1.34           | 3.89e-01 |
| 3                            | 2     | 1.46           | 4.29e-01 |
| 7                            | 1     | 0.79           | 5.48e-01 |
| 21                           | 2     | 2.11           | 6.28e-01 |
| 14                           | 1     | 1.32           | 7.35e-01 |
| 5                            | 1     | 1.51           | 7.82e-01 |
| 4                            | 1     | 1.7            | 8.22e-01 |
| 15                           | 1     | 1.81           | 8.41e-01 |
| 22                           | 2     | 3.62           | 8.83e-01 |
| non-rhythmic                 | 23    | 31.11          | 9.84e-01 |

**Supplemental Figure 6.** Promoters with multiple EEs and ABREs confer evening expression and cold responsiveness

**(A)** Gene Ontology analysis of genes whose 3kb upstream region contains at least 3EEs. GO analysis was conducted with FatiGO from the Babelomics server using default parameters.

**(B)** Phase of expression of genes whose 3kb upstream region contains at least 3EEs. Rhythmicity was evaluated based on the long day microarray dataset published by Mockler et al. 2007. Statistical calculations were conducted with Phaser (Michael et al., 2007)

(A)

**ABREL**

```

At 1 ---TAAAATTAC--AATT-----TAGCCACTTACATA---ACTCACGTTAGGTTT-GAG-----CCCATC---ACATCA---
Al 1 ---TAAAATTAC--AATTATTTTTAGCCACTTACATA---ACTCACGTTAGGTTT-GAGACTTTGAGCCCATC---ACATTA---
Br 1 ---TAAAATGGC--AAATATTTTT-CAGCCACTTACAAAG---TCTCACGTTAGGTTT-GAG-----CCCATC---GCATACA---
Cr 1 AATTAATTGTAATTGAGTTATTTT-CAGCCACTTACGCA---GCTCACGTTAGGTTT-GAG-----CCCATG---ACATTA---
De 1 ---TAAAATGGA--AATAATTTTT-CAGCCACTTACAAAG---TCTCACGTTA-----AGAG-----CCCATC---CCATATA---
Sa 1 TAATACTAAAATCAGTTATTTT-CAGCCACTTAAATG---TCTCACGTTAGGTTT-GAG-----CCCATG---GCATACA---
Tg 1 ---TATTATTAC--AGTTATTTTT-CAGCCACTTACATA---ACTCACGTTAGGTTT-GAG-----CCCATC---ACATTA---
Aa 1 ---CTAAATTAGA-AATGATTAT-AGCCCAATTACGTA CGAATCTCACGTTAGGTTT-GAG-----CCCATCCATACATGGGAGG
    
```

**SBX**

```

At 60 --CATGGT-----ACATGACC-AAA-----GCCCG--GTATGTT-ACCATGGAGTATCTTTCAGA-----CAAGA-
Al 73 --CATGGT-----ACATGACC-AAA-----GCCCG--GTATGTT-ACCAT-----ATTATTCAGA-----CAAGA-
Br 67 --TATAGAAGA-----GCATGACC-TGAAAAA-----GCCCG-CAGTTATGTT-CCAT-----GTTTCAGA-----CACCAG-
Cr 71 --CATGGT-----ACATGACC-TGAAAAAAG-----GCCCG--GTATGTTCCACAT-----ATTTCAGAGTTTCAGACACAGA-CACCA-
De 62 --TAT-----GCATGACC-TGAAAAA-----GCCCG-CAGTTATGTT-CTAT-----GTTTCAGA-----CACCAG-
Sa 71 --CATGGA-----ACATGACC-TGAAAAA-----GCCCG-GATGTGTG-TCCAT-----CTTCAGA-----CACCAG-
Tg 66 --CATGGT-----GCAT-ACC-TA-----GCCCG--GTATGTTA-ACCAT-----ATTTCAGA-----CACCAG-
Aa 77 CTCAGGCTGGGAGCATG-CATGACC-TGAAAAA-----GCCCG--TTCAT-----CTTCAGA-----CTCCA-
    
```

**ME** **LBX**

```

At 115 ---GCC-----ATCCAGACAGAA-----GFGG-CCACAC- AATC- GGAATC- TATGG-AGATC--ATTACAATATATGCTC-CACATCT
Al 123 ---GCCG--CCATCCAGACAGAA-----GFGG-CCACAC- AATC- AGAATC- TATGG-AGAGC--ATTACAATATATGCTCGCATCT
Br 129 CCTGCCA-GCCATCC-ACCAGAGT-----GFGG-CGCCAC- C-CC- GGAATC- TATGGTAGATC--ACTACAATATATGCTCGCATCC
Cr 140 ---GCCAAGCGATCCAGACAGAA-CACACAAG-FGG-CAGCAC- AATC- GGAATC- TATGG-AGATCTGAATACAATATATGCTCGCATCT
De 112 CCTGCCA-GCCATCC-ACCAGAGT-----GFGG-CGCCAC- CAC- GGAATC- TATGGTAGATC--GCTACAATATATGCTCGCATCC
Sa 122 ---GCCA-----TC--ACCAGAA-----GFGG-CCACAC- AATC- GGAATC- TATGG-TGAT--ACTACAATATATGCTCGCATCT
Tg 112 ---GCCA-----TCCAGACAGAA-----GFGG-CGCCAC- AAA- GGAATC- TATGG-AGATC--ACTACAATATATGCTCGCATCT
Aa 132 ---GCCA-----TCTAAAGAG-----TGG-CGCCAC- CAC- GGAATC- TATGG-AGATC--ATTACAATATATGCTCGCATCT
    
```

**ABREL** **ABREL**

```

At 186 TATTGCG- CACGTCCTCTTATHT-----GGCGAGTGATCAACGNCACAGATCTCTGCCACACTCTGATTGGT-CACGTATCATTTTT-
Al 197 TATTGCG- CACCTCTCTTGGTAT-----GGCGAGTGATCAACGNCACAGATCTCTGCCACACTCTGGTGGT-CACGTATCATTTTT-
Br 202 TATTGCG- CACGTCG-TCTGTTA-----GGAGGAAAGATCAACGNCACATATCTCTTGGCCCTCTCATTTGGT-CACGTATGTTTTGTA
Cr 226 TATTGCG- CACGTCGTTGTTT-----GGCGGAAAGATCAACGNCACATATCTCTTGGCCACTCTGATTGGT-CACGTATGTTTTGTA
De 192 TATTGCG- CACCTCTCTGTT-----GGAGGAAAGATCAACGNCACATATCTCTTGGCCCTCTCATTTGGT-CACGTATGTTTTGTA
Sa 191 TATTGCG- CACCTCTGTTGTT-----GGCGGAAAGATCAACGNCACATATCTCTTGGCCACTGATTGGT-CACGTATCTTTG-T
Tg 183 TATTGCG- CACCTCTGTT-GTT-----GGAGGAAAGATCAACGNCACATATCTCTTGGCCACTCTGATTGGT-CACGTATCTTTGTT
Aa 201 TATTGCG- CACCTCTCTCTTA-----GGCGGAAAGATCAACGNCACATATCTCTTGGCCACTCTGATTGGT-CACGTATCTTTGTT
    
```

**EE** **PBX**

```

At 269 ATTCTGCTACTTGTATATGCTGTACA---GTAGACAAGTGGTAA---GATTTAA-ATATCT-AAAAGATG--TGFG-GGCCCA-
Al 280 TAIGTCTACTTGTATATGCTGTAG-ACGTTTCATGTAGA-CAAGTGGGAA---GATTTAA-ATATCT-AAAAGCAAG--TGFG-GGCCCA-
Br 285 TAT-ITCAACTTGTATATGCTGTAGA---GTGGA-CAAGTGGGAGAGAAAGA-AAA-ATATCT-AAAAGAG--TGFG-GGCCAT-
Cr 315 TATGCTGTTA---TAGAGTGTAGA---CAAGTGGGAGAGAAAGTAA-ATTAATATCT-AAAAGGAAATCTG-GGCCCA-
De 275 TATATCAACTTGTATATGCTGTGGA---GTGGA-CAAGTGGGAGAGAAAGTGA-AAA-ATATCT-AAAAGAG--TGFG-GGCCCA-
Sa 273 TATGCTGTTA---TAGAGTGTAGA---GTGGA-CAAGTGGGAA---GA--A-AAA-ATATCT-AAAAGGAAAG--CCTG-GGCCCA-
Tg 266 TATGCTTACTTGTATATGCTGTAGA---GTGGA-CAAGTGGGAG---GATTA-AAA-ATATCT-AAAAGCAAG--TGFG-GGCCCA-
Aa 279 --GTGCTACTTGTATATGCTGTAGAC---TAGACAAGTGGGAA---AATTA-AAA-ATATCT-AAAAGGAG--CATG-GGCCCA-
    
```

**EE**

```

At 347 -----TFT-AGATATTTT-CTCAACGGGCTG-TGCTC-AAAAGCTGCCG--TTTATCTACAACCATCG---AACGGCTCGAAACTA
Al 360 -----TFT-AGATATTTT-CTCAACGGGCTG-TGCTC-AAAAGCTGCCG--TTGAT-----CA-----AACGGCTCGAAAAGT
Br 363 TGTAGCTT-AGATATTTT-CTCAACGGGCTG-TGCTC-AAAAGCTGCCG--TTAATCAATACACACATCA-CAGCGCTCGAATCTC
Cr 387 -----TFT-AGATATTTT-CTCAACGGGCTG-ATC-T-AAAAGCTGCCG--TTATTTTACAGCCATCC---CAGCGCTCGAATCTG
De 353 TTTAGGCT-AGATATTTT-CACAACGGGCTG-TGCTC-AAAAGCTGCCCTCC-TTAAACCGATACCACATCA-CAGCGCTCGAATCTC
Sa 348 -----TFT-AGATATTTT-TGAACGGGCTG-TGCTC-AAAAGCTGCCG--TTGATCTATACCATCAACAGCGGCTCTATCTC
Tg 342 -----TFT-AGATATTTT-CTCAACGGGCTG-TGCTC-AAAAGCTGCCG--TTAATCTACAGCCATCG---AACGGCTCGAATCTG
Aa 352 -----TFT-AGATATTTT-CTCAACGGGCTG-TGCTC-AAAAGCTGCCG--TTAATCCATATCCATCA---AACGGCTTGAAGCTC
    
```

**EE**

```

At 421 TTCGGGCTA-GCTGCCGAAA--CTTCTTAAAGGAATTTGTTGAGTGGCTT-----GA-ATCAACGGTGGATAA-TTCGAAG
Al 423 TTCGGGCAA-GCTGCCGAAA--TCTTATAAAGGAATTTGTTGAGTGGGACT-----GA-ATCAACGGTGGAGAA-TTCGAGG
Br 450 TTCAGGTCAA-GCTGCCGAAA--CTTGGCCGAGGAATTT--GTGTGGACTCAGTCAACATGAAATCAACGGCGGAAAT-TTCGAAG
Cr 462 TTCGGGAAA-GCTGCCGAAA--CTTTTAAAGGAATTTTATAGTGGGACTCAGTCACTGATGAGTGAATCAACGGCGGAAAAT-TTCGAAG
De 440 TTCGGGCAA-GCTGCCGAAA--CTTGGTGGGACTCAGTCACTCAACCTGAGATCAACGGGAGAAAT-TTCGAAG
Sa 425 TTCGGGCAAAGCTGCCGAAAG--TTTTTAAAGGAATTTTGTAGTGGGACTCAGTCACTCAACCTGA-ATCAACGGTGGAAAAT-TTCGAAG
Tg 417 TTCGGGCAA-GCTGCCGAAA--CTTTTAAAGGAATTT-GTGGTGGGACTCAGTCACTCAACCTGA-ATCAACGGTGGAAAAT-TTCGAAG
Aa 428 TTCGGGTAGAA--GCCCGAAA--CTTGTAAAGGAATTT-GTGTGAGGACTCAGTCACTCAACCTGA-ATCAACGGTGGAGAG--TTGAAG
    
```

**EE** **HUD Box**

```

At 495 GTGTCAGTAACTCTGTAGCATCTGAACCTAGCTCCTCCAAAATATCTTGG-CATATG-----TCAGT-AGCTTTTTTTTTTGTGTAA
Al 497 GTGTCAGTAACTCTGTAGCATCTGAACCTAGCTCCTCCAAAATATCTTGG-CATATG-----TCAGT-AGCTTTTTTTTTTGTGTAA
Br 534 GTGTCAGTAACTCTGTAGCATCTGAACCTAGCTCCTCCAAAATATCTTGG-CATATG-----TCAGT-AGCTTTTTTTTTTGTGTAA
Cr 548 GTGTCAGTAACTCTGTAGCATCTGAACCTAGCTCCTCCAAAATATCTTGG-CATATG-----TCAGT-AGCTTTTTTTTTTGTGTAA
De 525 GTGTCAGTAACTCTGTAGCATCTGAACCTAGCTCCTCCAAAATATCTTGG-CATATG-----TCAGT-AGCTTTTTTTTTTGTGTAA
Sa 512 GTGTCAGTAACTCTGTAGCATCTGAACCTAGCTCCTCCAAAATATCTTGG-CATATG-----TCAGT-AGCTTTTTTTTTTGTGTAA
Tg 501 GTGTCAGTAACTCTGTAGCATCTGAACCTAGCTCCTCCAAAATATCTTGG-CATATG-----TCAGT-AGCTTTTTTTTTTGTGTAA
Aa 511 GTGTCAGTAACTCTGTAGCATCTGAACCTAGCTCCTCCAAAATATCTTGG-CATATG-----TCAGT-AGCTTTTTTTTTTGTGTAA
    
```

**HUD Box**

```

At 579 TGAAACTTTAATTT--AATTGGCAA- CACATG- GAGATGTTA-TATACTT-AAATTAATAACTC-----AATAATCAATCATG---
Al 575 TGAAGTATTAACCT--AATTGGCAA- CACATG- GAGGT-TGA-TATA-----GAAA-----AATACAATCATG---
Br 608 TAAAGAAAGCAATTT--AACTPA---A- CACATG- CAGAGCTTA---TAGTT-AAACTAAATAAAGGAGGAAATAATCAATCATG---
Cr 633 CGAAAATTTAATTT--AAGTAGGCAA- CACATG- GAGGG-TTA-TATAGTT-AAATTAATAAAGGAGGAAATAATCAATCATG---
De 599 TAAAGAAAGTAATTT--ACTP---A- CACATG- CAGAGTTTAGTGT-TATT-AAACTAAATAAAGGAGGTAATAATCAATCATG---
Sa 585 T-AAAATTTAATCTTAAATCAGAGAA- CACATG- GAGAG--CA-TAAGTTTAAATTAATAA---GGAATTTGCAATCATGG---
Tg 576 TGAAACTTTAAGT--TATTAGCAA- CACATG- GAGGGTTA-TATGTT-AAATAAATAA---GGAATTAATCAATCATG---
Aa 587 TAAACTAATTAACCT--AATAGGCAA- CACATG- GAGCT-----TGAGTT-AAATAAATAAATAAAGGAAATAATCAATCATCTCATG
    
```

**TC Motif**

```

At 655 ACCA-C-----CAAACCTTGAATA- AAATAATCTCTGTATA-CTTGTA-CAA---TTCTTT- CCAA-TATATG
Al 635 ACCA-C-----AAAACCTTTAAATA-AA-TAATCTCTCTGATA-CTTCTG-CAA---TTCTTT- CCAA-TATTTG
Br 684 ACC-----ACCTTTAAATA---AT-G---TAAGAAATAATAATCAATCATGAC-ACCTTT- AATAATGTA---
Cr 714 ACCATAC-----CAAACCTTTAAATA-TAAATAATCTC--TGCTTA-CTTCAA-CAA---TTCTTT- CCAAATATTT-
De 678 ACC-----ACCTGTAAATA---ACAG--TATGTTATTAACGGGG--AGAG- TTATTT- ACCGATCTCA-
Sa 665 ACCA-A-----CAAACCTTTAAATA---ATGATCTGTAAGGTTA-GCTATAC-AAA---TTCTTT- CCAA-TATTAC
Tg 655 ACCACAC-----CAAACCTTTAAATA-TATATAATCTC--TGATTA-CCTCAA-CAA---TTCTTT- CCAAATATTG-
Aa 669 ACCAAACAAAGTAACAAACCTTTAAATA-----TCCGGTATAGTTTATTCTATA---TTCTTT- CCAA-TACTAC
    
```

(B)

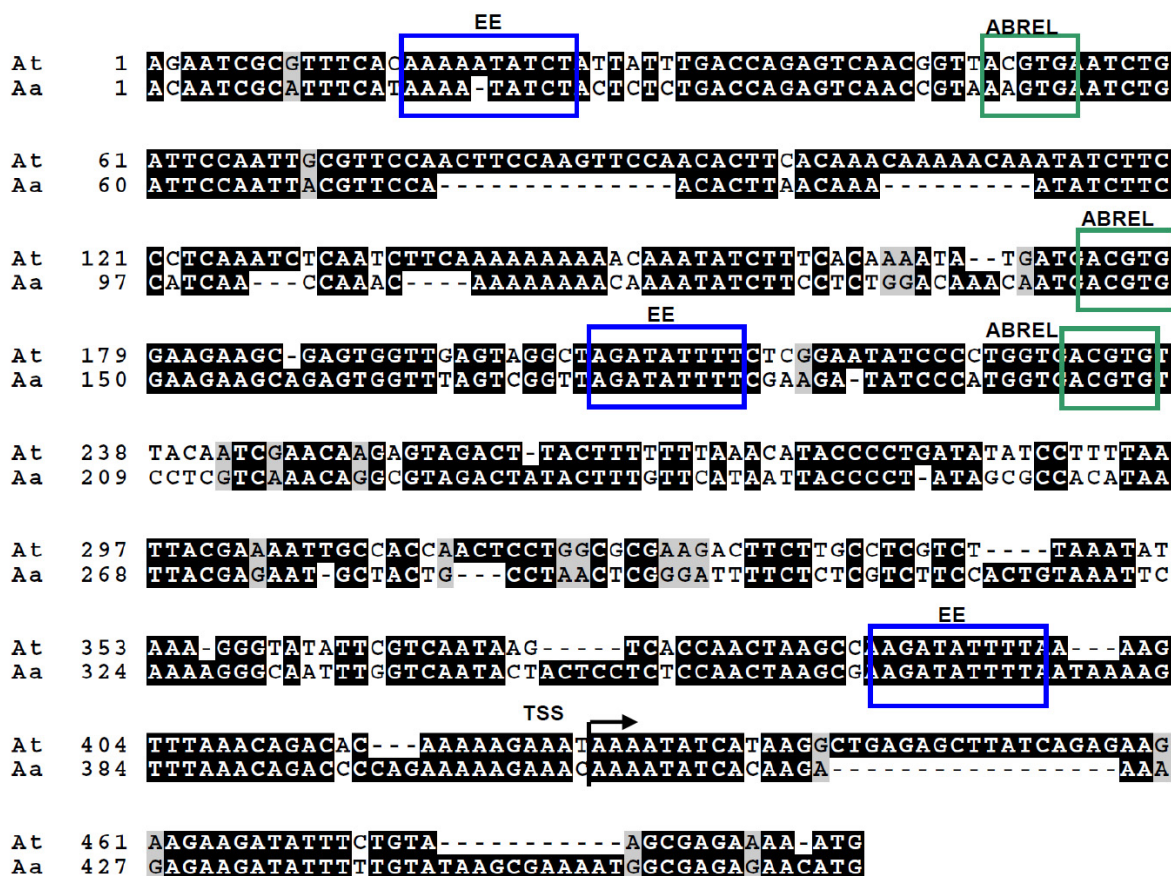

**Supplemental Figure 7.** Highly conserved modules within the *G1* and *FKF1* promoters contain multiple EEs and ABRELS

**(A)** Multiple sequence alignment of CRM2 within the *G1* promoter. CRM2s of *Arabidopsis thaliana* (At), *Arabidopsis lyrata* (Al), *Brassica rapa* (Br), *Capsella rubella* (Cr), *Diplotaxis erucoides* (De), *Sinapis alba* (Sa), *Turritis glabra* (Tr) and *Arabis alpina* (Aa) were aligned with DIALIGN and subsequently visualized with BOXSHADE. *Cis-regulatory* elements that are described in the paper are highlighted with colored boxes.

**(B)** Pairwise alignment of CRM\_FKF1. The conserved region of CRM\_FKF1 from *Arabidopsis thaliana* (At) and *Arabis alpina* (Aa) was aligned with DIALIGN and subsequently visualized with BOXSHADE. *Cis-regulatory* elements that are described in the paper are highlighted with colored boxes.

| Module        | Position (rel. to ATG) |       | Length (bp) |
|---------------|------------------------|-------|-------------|
|               | from                   | to    |             |
| <b>CRM1</b>   | -703                   | -524  | 179         |
| <b>CRM2</b>   | -1759                  | -1061 | 698         |
| <b>CRM3</b>   | -2303                  | -2123 | 180         |
|               |                        |       |             |
| <b>CRM2-A</b> | -1759                  | -1485 | 274         |
| <b>CRM2-B</b> | -1484                  | -1227 | 257         |
| <b>CRM2-C</b> | -1226                  | -1061 | 165         |

**Supplemental Table 1.** Positions and lengths of three CRMs and CRM2 sub-fragments in the *G/* promoter as described in the manuscript.



| Conservation shown as WEBLOGO (all eight species included) | Name / Consensus             | Position          | Reference                                   |
|------------------------------------------------------------|------------------------------|-------------------|---------------------------------------------|
|                                                            | ABREL<br>ACGTG               | -1741 to<br>-1737 | Mikkelsen et al.<br>Plant Journal<br>(2009) |
|                                                            | Starch-Box<br>AAGCCC         | -1699 to<br>-1694 | Michael et al<br>PLOS Genetics<br>(2008)    |
|                                                            | Morning Element<br>CCACAC    | -1639 to<br>-1694 | Michael et al<br>PLOS Genetics<br>(2008)    |
|                                                            | LUX Binding Site<br>CGAATC   | -1628 to<br>-1623 | Helper et al..<br>Current Biology<br>(2011) |
|                                                            | ABREL<br>CACGT               | -1580 to<br>-1576 | Mikkelsen et al.<br>Plant Journal<br>(2009) |
|                                                            | ABREL<br>CACGT               | -1519 to<br>-1515 | Mikkelsen et al.<br>Plant Journal<br>(2009) |
|                                                            | Evening Element<br>AAAATATCT | -1456 to<br>-1448 | Harmer et al.<br>Nature (2000)              |
|                                                            | Protein-Box<br>GGCCCAT       | -1433 to<br>-1427 | Michael et al<br>PLOS Genetics<br>(2008)    |
|                                                            | Evening Element<br>AAAATATCT | -1424 to<br>-1416 | Harmer et al.<br>Nature (2000)              |
|                                                            | Evening Element<br>AAAATATCT | -1238 to<br>-1230 | Harmer et al.<br>Nature (2000)              |
|                                                            | HUD Box<br>CACATG            | -1224 to<br>-1219 | Michael et al.<br>PLOS Biology<br>(2008)    |
|                                                            | HUD Box<br>CACATG            | -1170 to<br>-1165 | Michael et al.<br>PLOS Biology<br>(2008)    |
|                                                            | CT element                   | -1072 to<br>-1067 | Bernard et al.<br>BMC Genomics<br>(2010)    |

**Supplemental Table 2.** Conserved *cis*-regulatory elements in the *GI* promoter of *A. thaliana*

Conservation of previously described *cis*-regulatory elements within CRM2 of *A. thaliana GI* is shown as WEBLOGOS. CRM2s of *Arabidopsis thaliana*, *Arabidopsis lyrata*, *Brassica rapa*, *Capsella rubella*, *Diplotaxis eruroides*, *Sinapis alba*, *Turritis glabra* and *Arabis alpina* were aligned with DIALIGN and subsequently visualised with WEBLOGO. WEBLOGOS contain the sequence information of all 8 species. Positions relative to translational start site of *GI*. (Red = CRM2-A. -1759 to -1485bp relative to the ATG; Cyan = CRM2-B. -1484 to -1227bp relative to *GI*; Lilac: CRM2-C. -1226 to -1061bp relative to ATG)

| <b>Construct</b>             | <b>p-Value</b> | <b>Gated</b> |
|------------------------------|----------------|--------------|
| <i>2.5kb GI:LUC</i>          | 2.42E-11       | yes          |
| <i>1.8kb GI:LUC</i>          | 4.61E-05       | yes          |
| <i>1.1kb GI:LUC</i>          | 0.019          | no           |
| <i>CRM2-NOS:LUC</i>          | 1.33E-08       | yes          |
| <i>3.6kb FKF1:LUC</i>        | 0.000654       | yes          |
|                              |                |              |
| <i>CRM2-A-NOS:LUC</i>        | 0.095          | no           |
| <i>CRM2-B-NOS:LUC</i>        | 0.0011         | yes          |
| <i>CRM2-C-NOS:LUC</i>        | 0.026          | no           |
|                              |                |              |
| <i>CRM2-[TA]-NOS:LUC</i>     | 0.000104       | yes          |
| <i>CRM2-[TEE]-NOS:LUC</i>    | 0.025          | no           |
| <i>CRM2-[TA-TEE]-NOS:LUC</i> | 0.265          | no           |

**Supplemental Table 3.** ‘Gating Scores’ of all constructs used in this study.

Gating Assays were performed as described in Fig. 4. but with each 3 independent homozygous transgenic lines (number of individual seedlings: 3-6 for each line). All values were normalised to their own 24h mean and the deviation from this mean was calculated for each timepoint. P values are a cumulative calculation from 2 independent experiments with 1 homozygous line as shown in Figure 4 and 1 additional experiment with 3 independent homozygous lines. Statistical significance was determined in an ANOVA setting; P values < 0.01 indicate a gated response.



| ID        | # EE | # ABREL | Diurnal Rhythmicity | Description                                                              |
|-----------|------|---------|---------------------|--------------------------------------------------------------------------|
| AT1G10760 | 3    | 11      | very strong         | SEX1 (STARCH EXCESS 1); alpha-glucan, water dikinase                     |
| AT1G22770 | 3    | 4       | very strong         | GI (GIGANTEA)                                                            |
| AT1G48330 | 3    | 4       | very strong         | unknown protein                                                          |
| AT2G21660 | 4    | 4       | very strong         | CCR2 (COLD, CIRCADIAN RHYTHM, AND RNA BINDING 2)                         |
| AT3G20800 | 3    | 1       | very strong         | rcd1-like cell differentiation protein, putative                         |
| AT4G25480 | 3    | 10      | very strong         | DREB1A (DEHYDRATION RESPONSE ELEMENT B1A); CBF3                          |
| AT4G29190 | 3    | 2       | very strong         | zinc finger (CCH-type) family protein                                    |
| AT4G33980 | 4    | 7       | very strong         | unknown protein                                                          |
| AT5G24470 | 5    | 2       | very strong         | APRR5 (ARABIDOPSIS PSEUDO-RESPONSE REGULATOR 5)                          |
| AT5G48250 | 3    | 3       | very strong         | zinc finger (B-box type) family protein                                  |
| AT1G68050 | 3    | 6       | very strong         | FKF1 (FLAVIN-BINDING, KELCH REPEAT, F BOX 1)                             |
| AT1G07040 | 5    | 3       | robust              | unknown protein                                                          |
| AT1G54410 | 3    | 1       | robust              | dehydrin family protein                                                  |
| AT2G15880 | 3    | 6       | robust              | leucine-rich repeat family protein / extensin family protein             |
| AT2G33830 | 3    | 1       | robust              | dormancy/auxin associated family protein                                 |
| AT3G05800 | 3    | 5       | robust              | transcription factor                                                     |
| AT3G07650 | 3    | 2       | robust              | COL9 (CONSTANS-LIKE 9); transcription factor                             |
| AT3G15450 | 3    | 3       | robust              | unknown protein                                                          |
| AT3G15830 | 3    | 2       | robust              | phosphatidic acid phosphatase-related / PAP2-related                     |
| AT3G51400 | 3    | 5       | robust              | unknown protein                                                          |
| AT3G61580 | 3    | 6       | robust              | delta-8 sphingolipid desaturase (SLD1)                                   |
| AT4G16860 | 4    | 2       | robust              | RPP4 (recognition of peronospora parasitica 4)                           |
| AT4G17090 | 3    | 1       | robust              | CT-BMY (CHLOROPLAST BETA-AMYLASE); beta-amylase                          |
| AT4G25470 | 4    | 3       | robust              | CBF2 (C-REPEAT/DRE BINDING FACTOR 2)                                     |
| AT4G25490 | 3    | 6       | robust              | CBF1 (C-REPEAT/DRE BINDING FACTOR 1)r                                    |
| AT4G26530 | 3    | 2       | robust              | fructose-bisphosphate aldolase, putative                                 |
| AT5G23570 | 3    | 0       | robust              | SGS3 (SUPPRESSOR OF GENE SILENCING 3)                                    |
| AT1G28060 | 3    | 5       | slightly rhythmic   | small nuclear ribonucleoprotein family protein                           |
| AT1G42650 | 3    | 6       | slightly rhythmic   | transposable element gene                                                |
| AT1G44100 | 3    | 0       | slightly rhythmic   | AAP5; amino acid transmembrane transporter                               |
| AT1G60270 | 3    | 4       | slightly rhythmic   | pseudogene, glycosyl hydrolase family 1                                  |
| AT1G71710 | 3    | 2       | slightly rhythmic   | inositol polyphosphate 5-phosphatase, putative                           |
| AT2G25190 | 3    | 2       | slightly rhythmic   | unknown protein                                                          |
| AT2G34840 | 3    | 2       | slightly rhythmic   | coatamer protein epsilon subunit family protein                          |
| AT3G14270 | 3    | 3       | slightly rhythmic   | phosphatidylinositol-4-phosphate 5-kinase family protein                 |
| AT3G45190 | 3    | 1       | slightly rhythmic   | SIT4 phosphatase-associated family protein                               |
| AT3G61570 | 3    | 7       | slightly rhythmic   | GDAP1 (GRIP-RELATED ARF-BINDING DOMAIN-CONTAINING ARABIDOPSIS PROTEIN 1) |
| AT4G16890 | 3    | 1       | slightly rhythmic   | SNC1 (SUPPRESSOR OF NPR1-1, CONSTITUTIVE 1)                              |
| AT4G25500 | 3    | 10      | slightly rhythmic   | ATRSP35; RNA binding / nucleic acid binding                              |
| AT4G31360 | 3    | 2       | slightly rhythmic   | selenium binding                                                         |
| AT4G31875 | 3    | 2       | slightly rhythmic   | unknown protein                                                          |
| AT5G01050 | 3    | 2       | slightly rhythmic   | laccase family protein / diphenol oxidase family protein                 |
| AT5G09450 | 3    | 5       | slightly rhythmic   | pentatricopeptide (PPR) repeat-containing protein                        |
| AT5G12270 | 4    | 9       | slightly rhythmic   | oxidoreductase, 2OG-Fe(II) oxygenase family protein                      |
| AT5G15980 | 3    | 7       | slightly rhythmic   | pentatricopeptide (PPR) repeat-containing protein                        |
| AT5G23550 | 3    | 2       | slightly rhythmic   | FUNCTIONS IN: molecular_function unknown                                 |
| AT5G41830 | 3    | 2       | slightly rhythmic   | F-box family protein-related                                             |
| AT5G47020 | 4    | 2       | slightly rhythmic   | glycine-rich protein                                                     |
| AT5G59820 | 3    | 5       | slightly rhythmic   | RHL41 (RESPONSIVE TO HIGH LIGHT 41)                                      |
| AT1G21945 | 3    | 12      | not rhythmic        | transposable element gene                                                |
| AT1G45332 | 3    | 8       | not rhythmic        | mitochondrial elongation factor, putative                                |
| AT1G45474 | 3    | 5       | not rhythmic        | LHCA5; pigment binding                                                   |
| AT1G65360 | 3    | 0       | not rhythmic        | AGL23 (AGAMOUS-LIKE 23); transcription factor                            |
| AT1G70650 | 3    | 12      | not rhythmic        | zinc finger (Ran-binding) family protein                                 |
| AT1G75790 | 3    | 14      | not rhythmic        | sks18 (SKU5 Similar 18); copper ion binding / pectinesterase             |
| AT2G21680 | 4    | 5       | not rhythmic        | FUNCTIONS IN: molecular_function unknown                                 |
| AT3G05790 | 3    | 4       | not rhythmic        | LON4 (LON PROTEASE 4); ATP binding                                       |
| AT3G42050 | 3    | 2       | not rhythmic        | vacuolar ATP synthase subunit H family protein                           |
| AT4G03530 | 3    | 2       | not rhythmic        | transposable element gene                                                |
| AT4G30190 | 3    | 1       | not rhythmic        | AHA2; ATPase/ hydrogen-exporting ATPase                                  |
| AT4G31410 | 4    | 0       | not rhythmic        | unknown protein                                                          |
| AT5G03940 | 3    | 6       | not rhythmic        | CPSRP54 (CHLOROPLAST SIGNAL RECOGNITION PARTICLE 54 KDA SUBUNIT)         |
| AT5G05400 | 3    | 6       | not rhythmic        | disease resistance protein (CC-NBS-LRR class), putative                  |
| AT5G39910 | 3    | 4       | not rhythmic        | glycoside hydrolase family 28 protein                                    |
| AT5G50130 | 3    | 2       | not rhythmic        | short-chain dehydrogenase/reductase (SDR) family protein                 |
| AT5G51510 | 3    | 7       | not rhythmic        | unknown protein                                                          |
| AT5G56260 | 4    | 3       | not rhythmic        | dimethylmenaquinone methyltransferase family protein                     |
| AT5G56270 | 3    | 3       | not rhythmic        | WRKY2; transcription factor                                              |
| AT5G56490 | 3    | 4       | not rhythmic        | FAD-binding domain-containing protein                                    |
| AT5G59810 | 3    | 6       | not rhythmic        | SBT5.4; identical protein binding / serine-type endopeptidase            |
| AT5G64400 | 3    | 1       | not rhythmic        | FUNCTIONS IN: molecular_function unknown                                 |

**Supplemental Table 4.** Seventy-one Arabidopsis genes have at least 3 EEs in their promoters.

List of Arabidopsis genes that contain at least 3 EE within a 3kb upstream region of their translational start site. Rhythmicity was evaluated based on the long day microarray dataset published by Mockler et al., 2007.

| Cloning Primers |                                                              |                                                                |
|-----------------|--------------------------------------------------------------|----------------------------------------------------------------|
| ID              | Sequence                                                     | Comment                                                        |
| CRM1-F          | GGGGACAAGTTTGTACAAAAAAGCAGGCTTGTGGGATGATGATGTTATATGG         | to amplify CRM1. with GW site                                  |
| CRM1-R          | GGGGACCACCTTTGTACAAGAAAGCTGGGTAAAGAATACATACACAGAAGAAGATTG    | to amplify CRM1. with GW site                                  |
| CRM2-F          | GGGGACAAGTTTGTACAAAAAAGCAGGCTAGCCAGTTACATAAC                 | to amplify CRM2. with GW site                                  |
| CRM2-R          | GGGGACCACCTTTGTACAAGAAAGCTGGGTATTGGTAAAGAATTTGT              | to amplify CRM2. with GW site                                  |
| CRM3-F          | GGGGACAAGTTTGTACAAAAAAGCAGGCTTGTATGTCACGGTCTCTCTGT           | to amplify CRM3. with GW site                                  |
| CRM3-R          | GGGGACCACCTTTGTACAAGAAAGCTGGGTAAAGTTAAGTTATAGTCCAACG         | to amplify CRM3. with GW site                                  |
| CRM2-A-R        | GGGGACCACCTTTGTACAAGAAAGCTGGGTACATAAACAGTAGCACAATAAAATGATGAC | to amplify subfragment A of CRM2. with GW site                 |
| CRM2-B-F        | GGGGACAAGTTTGTACAAAAAAGCAGGCTGTACAGTAGAGACAAGTGGTAAGATTTT    | to amplify subfragment B of CRM2. with GW site                 |
| CRM2-B-R        | GGGGACCACCTTTGTACAAGAAAGCTGGGTACAGATATTTTGTAGGGGACTAAG       | to amplify subfragment B of CRM2. with GW site                 |
| CRM2-C-F        | GGGGACAAGTTTGTACAAAAAAGCAGGCTGACATATGTCTACTAGCTTTTTTTTGTG    | to amplify subfragment C of CRM2. with GW site                 |
| NOS-min-F       | AGACTCGTAAGCTTTTGCAGCTTCAAAGTCG                              | to amplify nos minimal promoter -101 +4. +Hind 3. + 8bp random |
| NOS-min-R       | ACGAGTCTAAGCTTACTCTAAATGGATACCGAGGGGAA                       | to amplify nos minimal promoter -101 +4. +Hind 3. + 8bp random |
| 2.5kb GI-F      | GGGGACAAGTTTGTACAAAAAAGCAGGCTACCAGCATATCTCTAATCAG            | to amplify 2.5kb of GI Promoter. with GW site                  |
| 1.8kb GI-F      | GGGGACAAGTTTGTACAAAAAAGCAGGCTAGCCAGTTACATAAC                 | to amplify 1.8kb of GI Promoter. with GW site. same as CRM2F   |
| 1.1kb GI-F      | GGGGACAAGTTTGTACAAAAAAGCAGGCTTATGCCACTGTGAATGTAATGG          | to amplify 1.1kb of GI Promoter. with GW site                  |
| GI-R            | GGGGACCACCTTTGTACAAGAAAGCTGGGTGGAACCGAACTAAACCCCAAC          | to amplify truncation constructs of GI Promoter. with GW site  |
| 3.6kb FKF1-F    | GGGGACAAGTTTGTACAAAAAAGCAGGCTTACAAGTTTTTGGCTGTGT             | to amplify FKF1 promoter in Arabidopsis. with GW site          |
| 0.5kb FKF1-F    | GGGGACAAGTTTGTACAAAAAAGCAGGCTAATCGCTTTCACAAAATATCT           | to amplify FKF1 promoter in Arabidopsis. with GW site          |
| FKF1-R          | GGGGACCACCTTTGTACAAGAAAGCTGGGTCTCGCTTACAGAAATATCTCTTC        | to amplify FKF1 promoter in Arabidopsis. with GW site          |

| Mutagenic Primers |                                                       |                                      |
|-------------------|-------------------------------------------------------|--------------------------------------|
| ID                | Sequence                                              | Comment                              |
| EE1-F             | GTACAGTAGAGACAAGTGGTAAGATTTAGAGTGTCTAAAAGATGTGTGAGGCC | to mutagenise EE1 in GI promoter     |
| EE1-R             | GGGCCTCACACATCTTTAAGACACTCTAAAATCTTACCCTGTCTCTACTGTAC | to mutagenise EE1 in GI promoter     |
| EE2-F             | TATCTAAAAGATGTGTGAGGCCATTTAGACACTCTCTCAACGGGCTGTT     | to mutagenise EE2 in GI promoter     |
| EE2-R             | GAACAGCCCGTTGAGAGAGTGTCTAAATGGGCCTCACACATCTTTAAGATA   | to mutagenise EE2 in GI promoter     |
| EE3-F             | GCATCTGAACCTAGCTCCCTCAGAGTGTCTGTGGACATATGCTACT        | to mutagenise EE3 in GI promoter     |
| EE3-R             | AGTGACATATGCCACAGACTCTGAGGGGAGCTAAGTTCAGATGC          | to mutagenise EE3 in GI promoter     |
| A1-F              | AATTTAGCCAGTTACATAACTCCTCGAAAGTTTGAAGCCATCACATCA      | to mutagenise ABREL 1 in GI promoter |
| A2-F              | ATATTGCTCACATCTTATTGCGCTCGACTCTTATTGGCAGTGATCAAC      | to mutagenise ABREL 2 in GI promoter |
| A3-F              | CTCTGTCTCCACTCTGATTGGTACTCGACATATTTATTGTGCTACTTG      | to mutagenise ABREL 3 in GI promoter |
| A1-R              | TGATGTGATGGGCTCAAACCTTCGAGGAGTTATGTAAGTGGGCTAAATT     | to mutagenise ABREL 1 in GI promoter |
| A2-R              | GTTGATCACTCGCCAAATAAGAGTCGAGGCGCAATAAGATGTGAGCAATAT   | to mutagenise ABREL 2 in GI promoter |
| A3-R              | CAAGTAGCACAAATAAATGATGTGAGTACCAATCAGAGTGGAGCAAGAG     | to mutagenise ABREL 3 in GI promoter |

Supplemental Table 5. Primer table
